# Supplementary material for: A facile online multi-gear capacitively coupled contactless conductivity detector for an automatic and wide range monitoring of high salt in HPLC
Source: Royal Society of Chemistry journal article supplement (doi:10.1039/d1an02249k), 2021-12-27
Supplement: d1an02249k1.pdf [file d1an02249k1.pdf]

## Supporting information

### A Facile Online Multi-gear Capacitively Coupled Contactless Conductivity Detector for Automatic and Wide Range Monitoring of High Salt in HPLC

Weiwen Liu<sup>a#</sup>, Ziqi Liang<sup>a#</sup>, Yuanyu Wang<sup>a</sup>, Jun Cao,<sup>a</sup> Qiang Zhang,<sup>a,\*</sup> Xiaoping Liu,<sup>a</sup> Yuxing Wang,<sup>c</sup> and Chengxi Cao<sup>a,b\*1</sup>

<sup>a</sup> Department of Instrument Science and Engineering, School of Electronic Information and Electrical Engineering, Shanghai Jiao Tong University, Shanghai 200240, China

<sup>b</sup> School of Life Sciences and Biotechnology, State Key Laboratory of Microbial Metabolism, Shanghai Jiao Tong University, Shanghai 200240, China

<sup>c</sup> School of Physics and Astronomy, Shanghai Jiao Tong University, Shanghai 200240, China

**Keywords:** automation; bioprocess; capacitively coupled contactless conductivity detection; electrolyte concentration; online process monitoring.

**Abbreviations:** M-C<sup>4</sup>D, multi-gear capacitively coupled contactless conductivity detection; RS, relative sensitivity.

#### S1. The software used for monitoring conductivity via M-C<sup>4</sup>D sensor

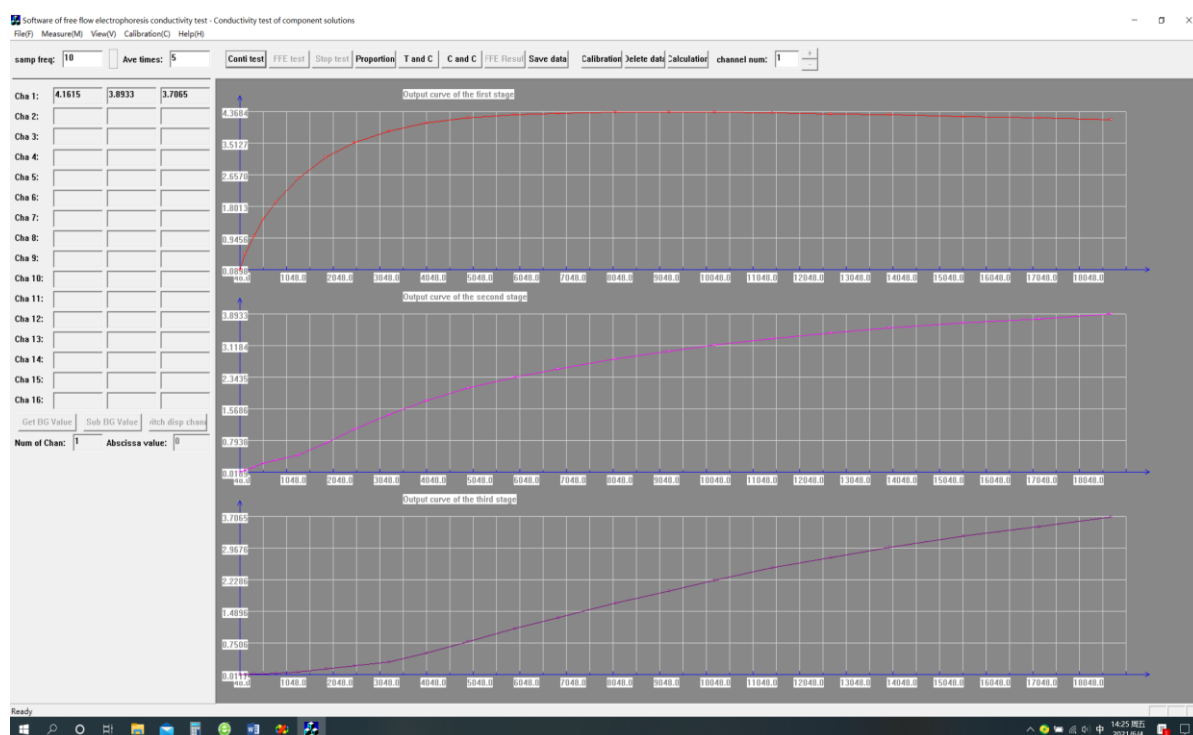

Figure S1. The screenshot of software platform.

<sup>1</sup> The 1<sup>st</sup> and 2<sup>nd</sup> correspondence authors: Dr. Chengxi Cao ([cxcao@sjtu.edu.cn](mailto:cxcao@sjtu.edu.cn)) and Dr. Q. Zhang ([billy\\_zq@sjtu.edu.cn](mailto:billy_zq@sjtu.edu.cn)).

<sup>#</sup> The first two authors have equal contribution to the work, the first gave the idea, performed the experiments, analyses and manuscript, and the second conducted model and computation, and performed the experiments and writing.

## S2. The least squares polynomial fitting

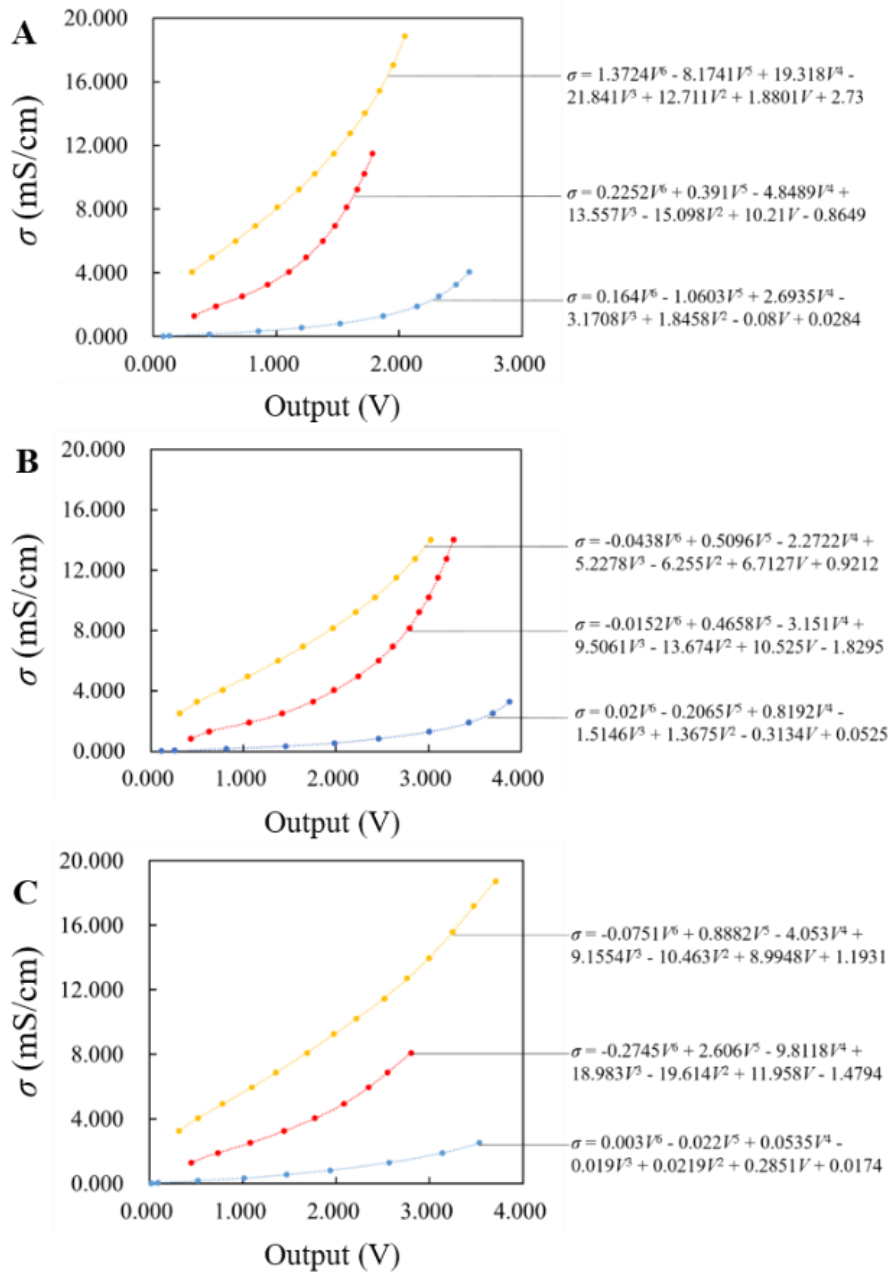

**Figure S2.** The least squares polynomial fitting. (A)  $r_i = 0.375$  mm. (B)  $r_i = 0.5$  mm. (C)  $r_i = 0.7$  mm.

## S3. Discussion on the method of expanding the measurement range via reducing $Z_c/Z$

The nonlinear output and poor sensitivity of the contactless conductivity detection sensor limit its measurement range due to the influence of coupled capacitances. In this paper, the measurement range of this type of sensor could be expanded by reducing  $Z_c/Z$  was presented. We would discuss it in detail below.

In eq. (7), (8) and (12), it can be observed that the capacitive reactance ( $Z_c = 1/\omega C$ ) of the coupled capacitances is related to  $\omega$ ,  $r_o$ ,  $r_i$ ,  $l_1$  and  $l_2$ , the impedance ( $R$ ) of the solution is related to  $\sigma$ ,  $r_i$ ,  $d$ ,  $l_1$  and  $l_2$ ,

and the sensitivity of the M-C<sup>4</sup>D sensor is related to  $\sigma$ ,  $\omega$ ,  $r_o$ ,  $r_i$ ,  $d$ ,  $l_1$  and  $l_2$ . Here, we used eq. (12) as well as the above boundary conditions in Section 2.3 to draw the sensitivity characteristic curves of the M-C<sup>4</sup>D sensor with different sensing section parameters and frequency (**Figure S3**) and the characteristic curves of  $Z_c/Z$  and  $d$ ,  $r_i$ ,  $l_2$ ,  $f$  with different conductivities (**Figure S4**). **Figure S3** showed that increasing the gap ( $d$ ), or the inner radius ( $r_i$ ) or the electrode length ( $l_2$ ) or reducing the frequency ( $f$ ) was beneficial to improve the sensitivity of the contactless conductivity detection sensor at higher conductivities. **Figure S4** indicated that increasing the gap ( $d$ ), or the electrode length ( $l_2$ ), or the frequency ( $f$ ) could reduce  $Z_c/Z$ . As for the inner radius ( $r_i$ ), it could be observed from the **Figure S4B** that  $Z_c/Z$  increased firstly and then decreased with the increase of  $r_i$ , and had a maximum value when  $r_i$  was at about 0.5 mm. In addition, **Figure S4** further revealed that  $Z_c/Z$  became larger and larger with the increase of  $\sigma$ . Hence, we thought that a wider measurement range could be achieved via the mechanism of M-C<sup>4</sup>D according to above analysis.

To verify the theory of expanding the measurement range by reducing  $Z_c/Z$ , we designed three kind of sensors with different inner radii of insulating pipe as described in Section 2.4 and calculated  $Z_c/Z$  in different gears at  $\sigma$  of 7 mS/cm. **Table S1** showed that the values of  $Z_c/Z$  of the first gear with inner radii of 0.375 mm, 0.5 mm and 0.7 mm were respectively 0.93, 0.94 and 0.84, the ones of the second gear were 0.7, 0.74 and 0.52, respectively, and the ones of third gear were respectively 0.47, 0.50 and 0.31. These revealed that the value of  $Z_c/Z$  of the first gear was the largest, the one of the third gear was the smallest, and the one of second gear was within the ones of the first and third gears.

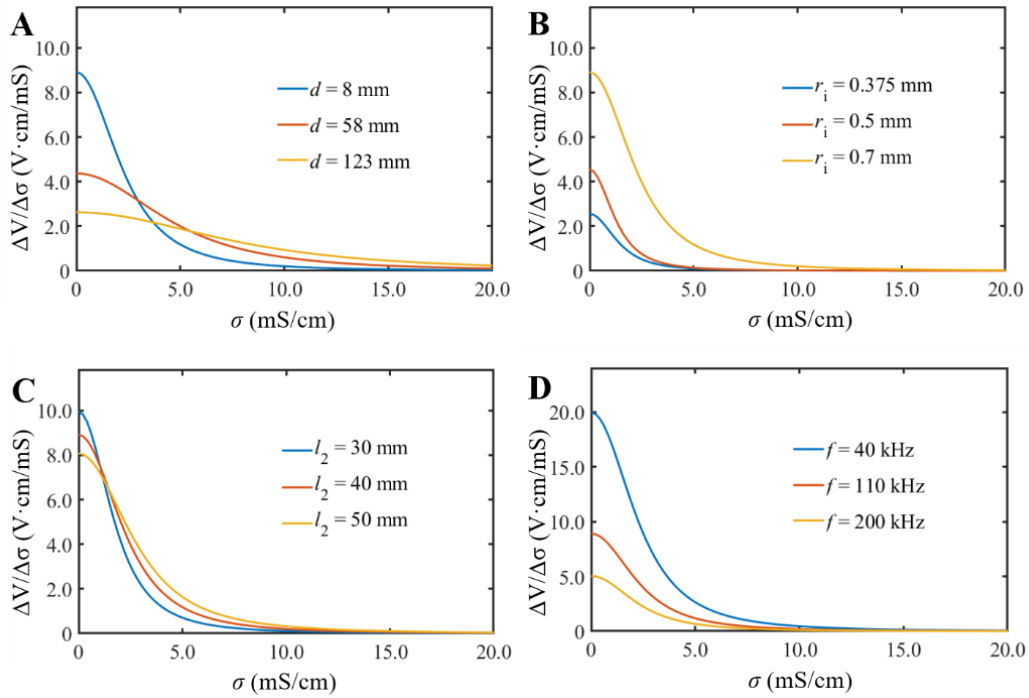

**Figure S3.** Sensitivity characteristic curves of the new sensor with different sensing section parameters and frequency. Digital computation parameters:  $\epsilon_0 = 8.8542 \times 10^{-12}$  F/m,  $\epsilon_r = 3.2$ ,  $R_f = 1$  M $\Omega$ ,  $C_f = 5$  pF,  $V_{pp} = 20$  V,  $r_o = 0.8$  mm. (A)  $d = 8$  mm, or 58 mm, or 123 mm,  $l_1 = 40$  mm,  $l_2 = 40$  mm,  $r_i = 0.7$  mm and  $f = 110$  kHz.

(B)  $d = 8$  mm,  $l_1 = 40$  mm,  $l_2 = 40$  mm,  $r_i = 0.375$  mm, or  $0.5$  mm, or  $0.7$  mm and  $f = 110$  kHz. (C)  $d = 8$  mm,  $l_1 = 40$  mm,  $l_2 = 30$  mm, or  $40$  mm, or  $50$  mm,  $r_i = 0.7$  mm and  $f = 110$  kHz. (D)  $d = 8$  mm,  $l_1 = 40$  mm,  $l_2 = 40$  mm,  $r_i = 0.7$  mm and  $f = 40$  kHz, or  $110$  kHz, or  $200$  kHz.

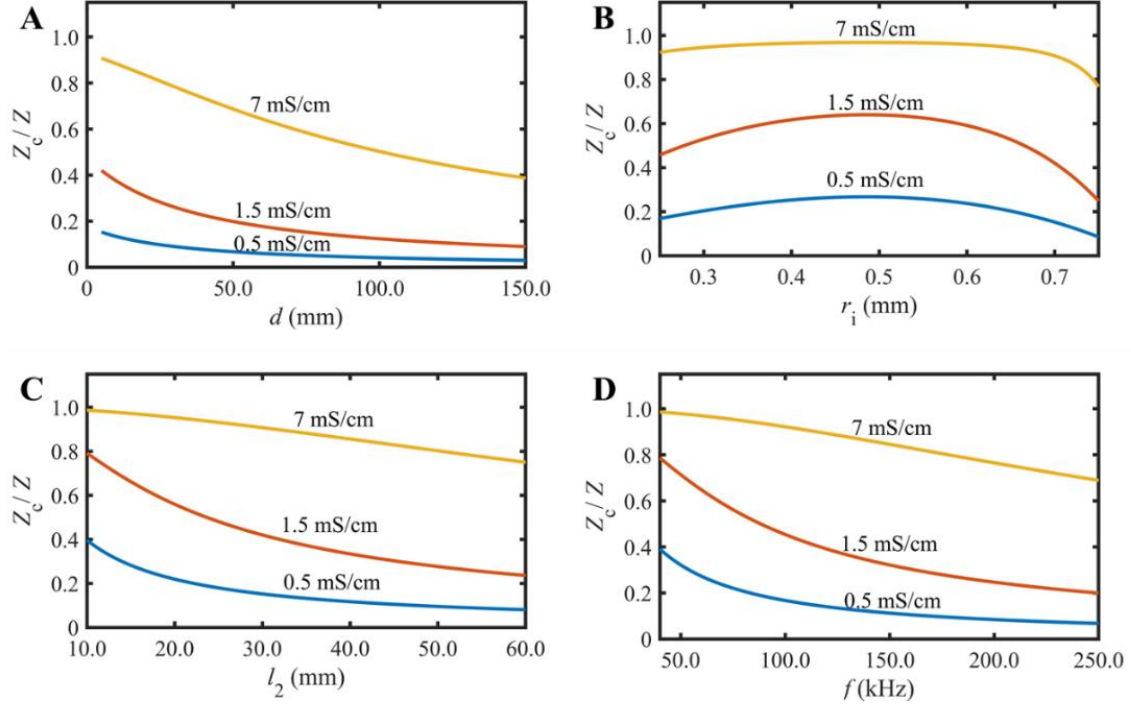

**Figure S4.** Characteristic curves of  $Z_c/Z$  and  $d$ ,  $r_i$ ,  $l_2$ ,  $f$  with different conductivities. Digital computation parameters:  $\epsilon_0 = 8.8542 \times 10^{-12}$  F/m,  $\epsilon_r = 3.2$ ,  $R_f = 1$  M $\Omega$ ,  $C_f = 5$  pF,  $V_{pp} = 20$  V,  $r_o = 0.8$  mm,  $l_1 = 30$  mm and  $\sigma = 0.5$  mS/cm, or  $1.5$  mS/cm, or  $7$  mS/cm. (A)  $d$  is from 5 mm to 150 mm,  $l_2 = 30$  mm,  $r_i = 0.7$  mm,  $f = 110$  kHz. (B)  $d = 5$  mm,  $l_2 = 30$  mm,  $r_i$  is from 0.25 mm to 0.75 mm,  $f = 110$  kHz. (C)  $d = 5$  mm,  $l_2$  is from 10 mm to 60 mm,  $r_i = 0.7$  mm,  $f = 110$  kHz. (D)  $d = 5$  mm,  $l_2 = 30$  mm,  $r_i = 0.7$  mm,  $f$  is adjusted from 40 kHz to 250 KHz.

**Table S1.** Comparisons of  $Z_c/Z$  in different gears ( $\sigma = 7$  mS/cm).

|                   | M-C <sup>4</sup> D ( $r_i = 0.375$ mm) | M-C <sup>4</sup> D ( $r_i = 0.5$ mm) | M-C <sup>4</sup> D ( $r_i = 0.7$ mm) |
|-------------------|----------------------------------------|--------------------------------------|--------------------------------------|
| $Z_c/Z$ of gear 1 | 0.93                                   | 0.94                                 | 0.84                                 |
| $Z_c/Z$ of gear 2 | 0.70                                   | 0.74                                 | 0.52                                 |
| $Z_c/Z$ of gear 3 | 0.47                                   | 0.50                                 | 0.31                                 |

**Table S2.** Comparisons of relative sensitivity (RS) in different gears.

|                  | M-C <sup>4</sup> D ( $r_i = 0.375$ mm) | M-C <sup>4</sup> D ( $r_i = 0.5$ mm) | M-C <sup>4</sup> D ( $r_i = 0.7$ mm) |
|------------------|----------------------------------------|--------------------------------------|--------------------------------------|
| RS of gear 1 (%) | 0.95                                   | 0.89                                 | 0.86                                 |
| RS of gear 2 (%) | 0.56                                   | 0.39                                 | 0.55                                 |
| RS of gear 3 (%) | 0.72                                   | 0.55                                 | 0.99                                 |

## ET130 IC/HPLC C4D Detector Headstage

[Request the Price](#)

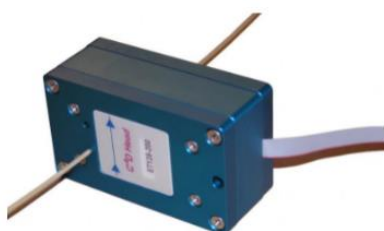

ET130 IC/HPLC C4D Detector Headstage

- ▶ Conductivity detector for IC, HPLC and FIA
- ▶ Conductivity range: 150  $\mu\text{S}/\text{cm}$  to 15  $\text{mS}/\text{cm}$
- ▶ Excellent peak resolution

The single detector of C<sup>4</sup>D for HPLC could not achieve the range of 0.015-20  $\text{mS}/\text{cm}$  obtained herein.

[Overview](#)

[Applications](#)

[Photos & Videos](#)

[Specifications](#)

[More Information](#)

- ▶ Conductivity range: 150  $\mu\text{S}/\text{cm}$  to 15  $\text{mS}/\text{cm}$
- ▶ Electrode ID: 1.6mm
- ▶ Electrode Gap: 4mm

Search

Catalog

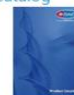

[Download our latest catalog](#)

Products

- Potentiostats
- EIS Electrochemical Impedance Spectroscopy
- Contactless Conductivity Detectors C4D
- Separation Science
- PowerChrom Chromatography
- isoPods™ Meters
- Laboratory Data Acquisition
- SDx Tethered Membranes
- Electrodes, Transducers, Accessories
- Software
- Kits and Bundles
- Complete Product List
- Specials

[Privacy Policy](#)

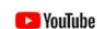

**Figure S5.** The specifications of ET130 C<sup>4</sup>D detector headstage (<https://www.edaq.com/ET130>).

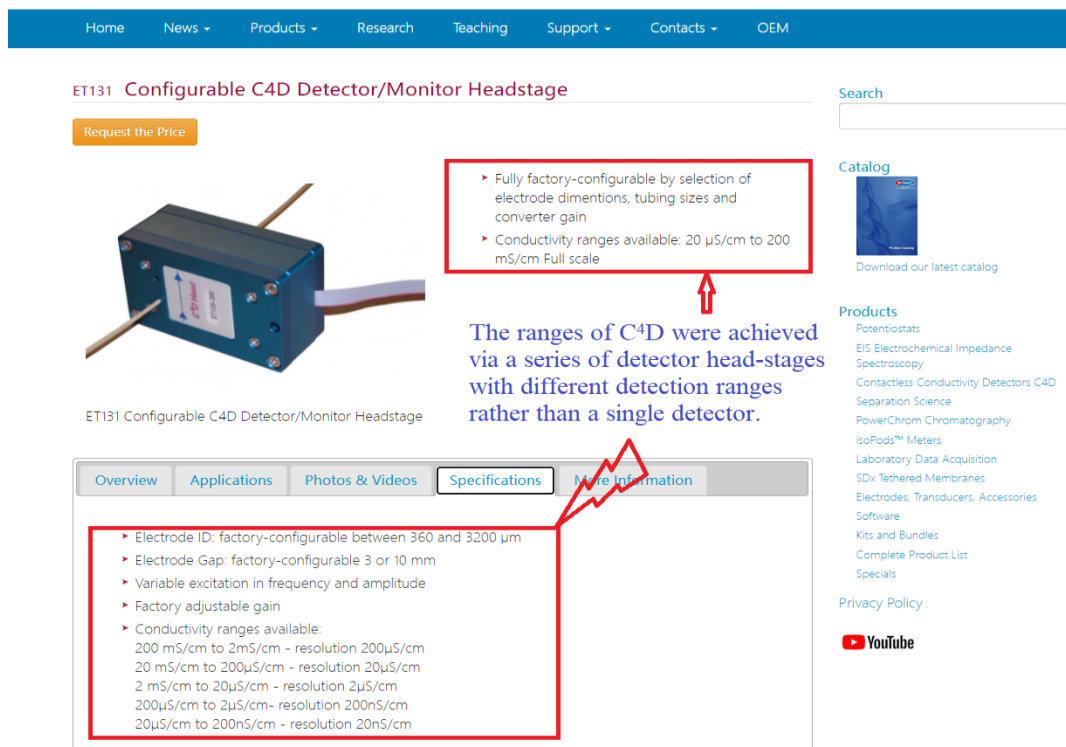

ET131 Configurable C4D Detector/Monitor Headstage

Request the Price

Search

Catalog

Download our latest catalog

Products

- Potentiostats
- EIS Electrochemical Impedance Spectroscopy
- Contactless Conductivity Detectors C4D
- Separation Science
- PowerChrom Chromatography
- isoPods™ Meters
- Laboratory Data Acquisition
- SDx Tethered Membranes
- Electrodes, Transducers, Accessories
- Software
- Kits and Bundles
- Complete Product List
- Specials

Privacy Policy

YouTube

ET131 Configurable C4D Detector/Monitor Headstage

Overview Applications Photos & Videos Specifications More Information

- Fully factory-configurable by selection of electrode dimensions, tubing sizes and converter gain
- Conductivity ranges available: 20  $\mu\text{S}/\text{cm}$  to 200  $\text{mS}/\text{cm}$  Full scale

The ranges of C<sup>4</sup>D were achieved via a series of detector head-stages with different detection ranges rather than a single detector.

- Electrode ID: factory-configurable between 360 and 3200  $\mu\text{m}$
- Electrode Gap: factory-configurable 3 or 10 mm
- Variable excitation in frequency and amplitude
- Factory adjustable gain
- Conductivity ranges available:
  - 200  $\text{mS}/\text{cm}$  to 2  $\text{mS}/\text{cm}$  - resolution 200  $\mu\text{S}/\text{cm}$
  - 20  $\text{mS}/\text{cm}$  to 200  $\mu\text{S}/\text{cm}$  - resolution 20  $\mu\text{S}/\text{cm}$
  - 2  $\text{mS}/\text{cm}$  to 20  $\mu\text{S}/\text{cm}$  - resolution 2  $\mu\text{S}/\text{cm}$
  - 200  $\mu\text{S}/\text{cm}$  to 2  $\mu\text{S}/\text{cm}$  - resolution 200 nS/cm
  - 20  $\mu\text{S}/\text{cm}$  to 200 nS/cm - resolution 20 nS/cm

**Figure S6.** The specifications of ET131 C<sup>4</sup>D detector headstage (<https://www.edaq.com/ET131>).

#### S4. The detection ranges of DDS and C<sup>4</sup>D detectors.

Figure S5 was the web screenshot of the specifications of ET130 C<sup>4</sup>D detector headstage. Figure S6 was the web screenshot of the specifications of ET131 C<sup>4</sup>D detector headstage. Figure S7 was the web screenshot of the specifications of DDS-307. The ranges of DDS and C<sup>4</sup>D were achieved via a series of detector head-stages with different detection ranges, rather than a single detector. Although the single detector head-stage of DDS currently used could achieve the range of 0.015-20  $\text{mS}/\text{cm}$  obtained herein, the single detector head-stage of C<sup>4</sup>D could not achieve this range.

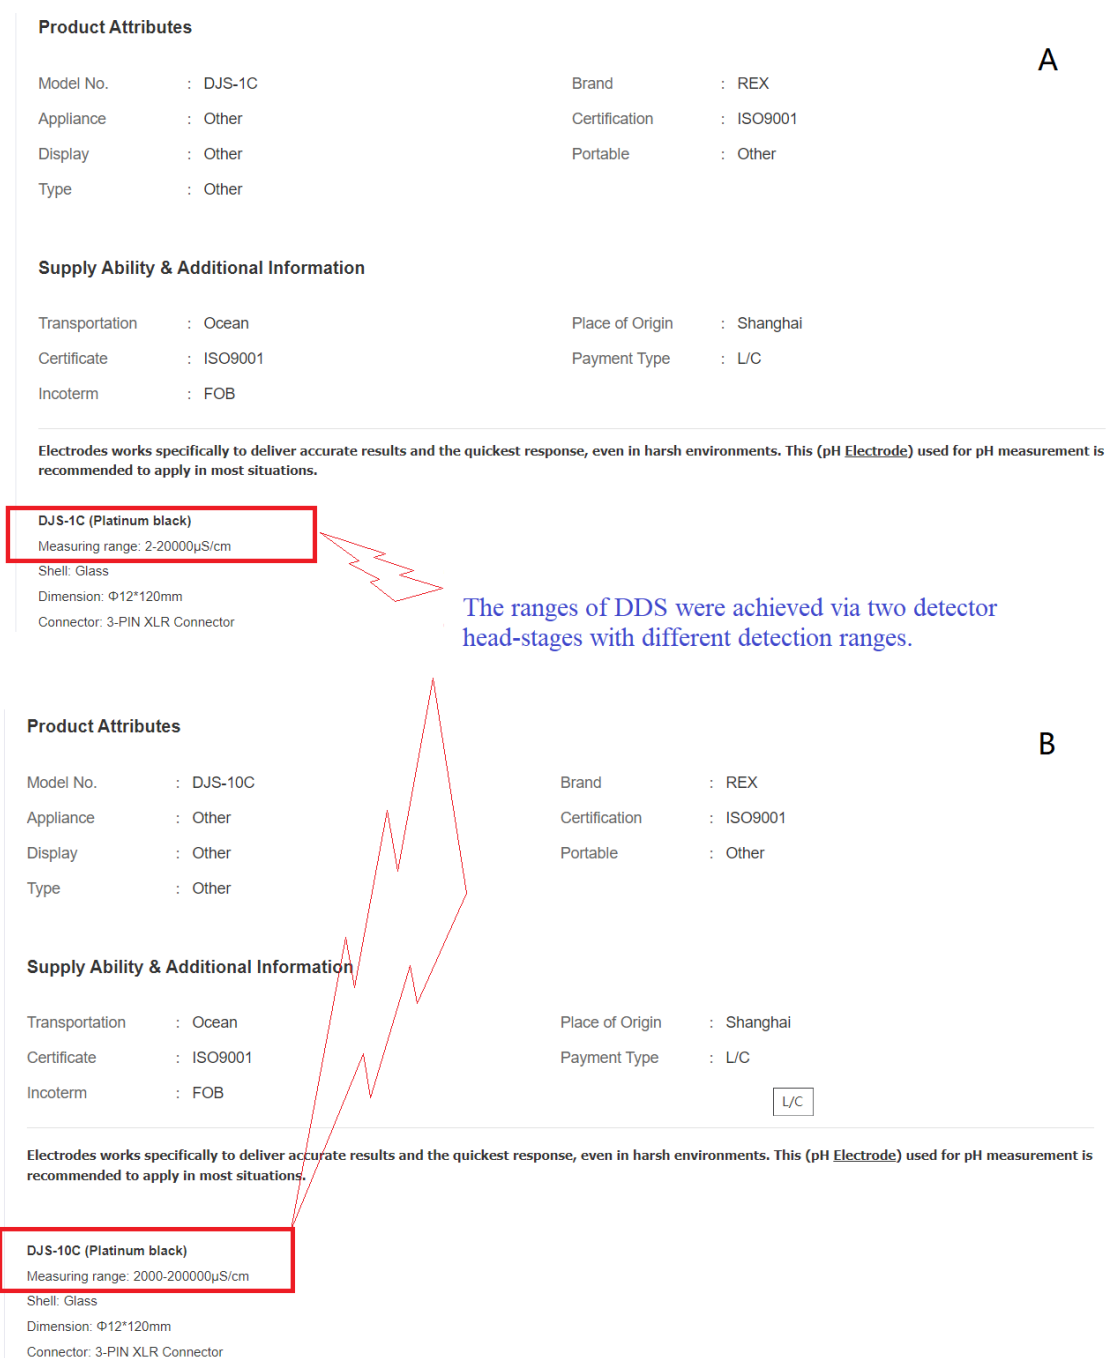

**Figure S7.** The specifications of DDS-307. (A) [https://www.inesarex.com/conductivity-meter/57581897.html#module\\_attr](https://www.inesarex.com/conductivity-meter/57581897.html#module_attr). (B) <https://www.inesarex.com/conductivity-electrode/57588299.html>

### S5. Conductivity test of KCl solutions at different temperatures.

Temperature effect is a common problem of C<sup>4</sup>D sensor because conductivities is temperature-dependent. When the temperature changes, the conductivity of the solution also changes. Figure S8 showed the conductivity curves of KCl solutions at different temperatures measured via both the online contactless M-C4D sensor and the offline contact DDS meter.

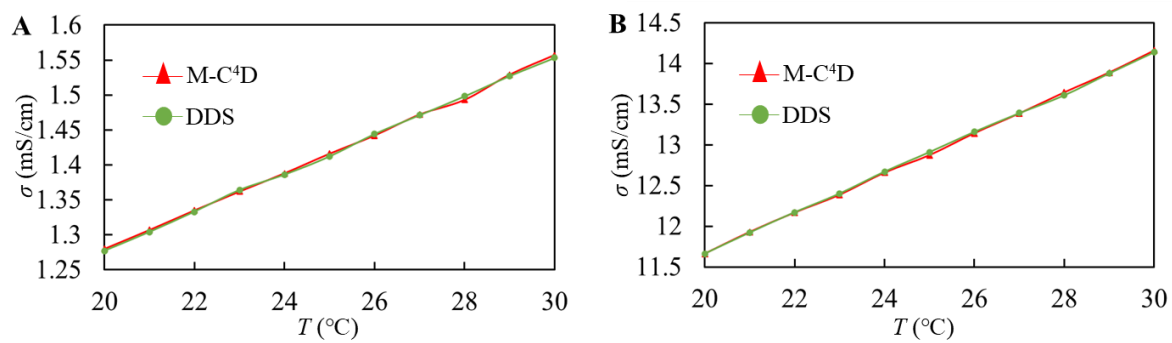

**Figure S8.** Conductivity curves of KCl solutions at different temperatures measured via both the online contactless M-C<sup>4</sup>D sensor and the offline contact DDS meter. 10 mM KCl (**A**) and 100 mM KCl (**B**).
